# Supplementary material
Source: HighWire-hosted journal article supplement (http://thorax.bmjjournals.com/highwire/filestream/173990/field_highwire_adjunct_files/3/62121088webonlyapp4.pdf)
Supplement: 62121088webonlyapp4.pdf [file 62121088webonlyapp4.pdf]

**Supplementary Table 3.** % Excess relative risks (95% credible intervals) for a 10 µg/m<sup>3</sup> increase in black smoke concentrations, respiratory mortality, 0-4 year exposure window, adjusted for urban-rural status.

| Carstairs decile | Mortality period 1 <sup>a</sup> |                          |                           | Mortality period 2 <sup>a</sup> |                          |                           | Mortality period 3 <sup>a</sup> |                          |                           | Mortality period 4 <sup>a</sup> |                          |                           |
|------------------|---------------------------------|--------------------------|---------------------------|---------------------------------|--------------------------|---------------------------|---------------------------------|--------------------------|---------------------------|---------------------------------|--------------------------|---------------------------|
|                  | No. of wards                    | Excess relative risk (%) | (95% CI)                  | No. of wards                    | Excess relative risk (%) | (95% CI)                  | No. of wards                    | Excess relative risk (%) | (95% CI)                  | No. of wards                    | Excess relative risk (%) | (95% CI)                  |
| 1                | 42                              | 26.7                     | (1.1, 58.6)               | 18                              | 7.1                      | (-36.2, 79.9)             | 13                              | -2.3                     | (-16.2, 13.9)             | 7                               | 1.5                      | (-20.8, 30.2)             |
| 2                | 39                              | 3.4                      | (-32.4, 58.3)             | 14                              | 1.0                      | (-53.8, 120.9)            | 10                              | 5.6                      | (-30.1, 59.4)             | 6                               | 10.3                     | (-41.4, 107.4)            |
| 3                | 38                              | -5.8                     | (-36.3, 39.2)             | 16                              | -4.8                     | (-55.9, 105.3)            | 15                              | 2.6                      | (-24.2, 39.0)             | 9                               | 3.5                      | (-39.9, 78.2)             |
| 4                | 40                              | 4.6                      | (-30.4, 57.2)             | 17                              | -15.7                    | (-63.7, 96.0)             | 16                              | 1.3                      | (-33.2, 53.7)             | 14                              | -4.0                     | (-63.8, 154.6)            |
| 5                | 43                              | 5.8                      | (-25.2, 49.7)             | 20                              | -3.8                     | (-56.0, 110.4)            | 16                              | 5.4                      | (-25.5, 49.0)             | 9                               | 24.4                     | (-30.4, 122.3)            |
| 6                | 37                              | 7.4                      | (-24.4, 52.7)             | 20                              | 2.3                      | (-51.8, 117.1)            | 23                              | 3.3                      | (-20.3, 33.9)             | 14                              | 17.1                     | (-27.2, 88.2)             |
| 7                | 32                              | -1.4                     | (-29.5, 37.8)             | 23                              | 4.0                      | (-50.9, 120.6)            | 31                              | 10.9                     | (-12.6, 40.9)             | 23                              | 35.9                     | (-11.0, 107.5)            |
| 8                | 43                              | 10.3                     | (-21.1, 54.1)             | 27                              | 2.6                      | (-51.0, 114.8)            | 19                              | 2.5                      | (-19.0, 29.7)             | 11                              | 15.3                     | (-35.8, 107.1)            |
| 9                | 36                              | -1.1                     | (-29.2, 38.3)             | 20                              | -2.2                     | (-53.9, 107.2)            | 21                              | 0.0                      | (-22.9, 29.8)             | 13                              | 10.1                     | (-32.9, 80.5)             |
| 10               | 43                              | 3.9                      | (-28.1, 50.1)             | 31                              | -15.8                    | (-62.2, 87.5)             | 21                              | -2.7                     | (-38.0, 52.6)             | 12                              | 3.1                      | (-51.8, 120.7)            |
|                  | <b>N=393</b>                    |                          | <b>P=0.60<sup>b</sup></b> | <b>N=206</b>                    |                          | <b>P=0.97<sup>b</sup></b> | <b>N=185</b>                    |                          | <b>P=0.97<sup>b</sup></b> | <b>N=118</b>                    |                          | <b>P=0.93<sup>b</sup></b> |

<sup>a</sup> Mortality period 1; 1982-86, period 2; 1986-90, period 3; 1990-94, period 4; 1994-98.

<sup>b</sup> P-values correspond to test for interaction using likelihood based GLM.
